# Supplementary material
Source: HighWire-hosted journal article supplement (https://cmaj.ca/highwire/filestream/58433/field_highwire_adjunct_files/1/diabetes-tobe-online_appendix_2.pdf)
Supplement: diabetes-tobe-online_appendix_2.pdf [file diabetes-tobe-online_appendix_2.pdf]

**Appendix 2:** Algorithm for the management of glucose levels in patients with diabetes used in the Diabetes Risk Evaluation and Microalbuminuria (DREAM 3) study. Note: HbA<sub>1c</sub> = hemoglobin A<sub>1c</sub>, FPGx2 = fasting plasma glucose repeated twice.

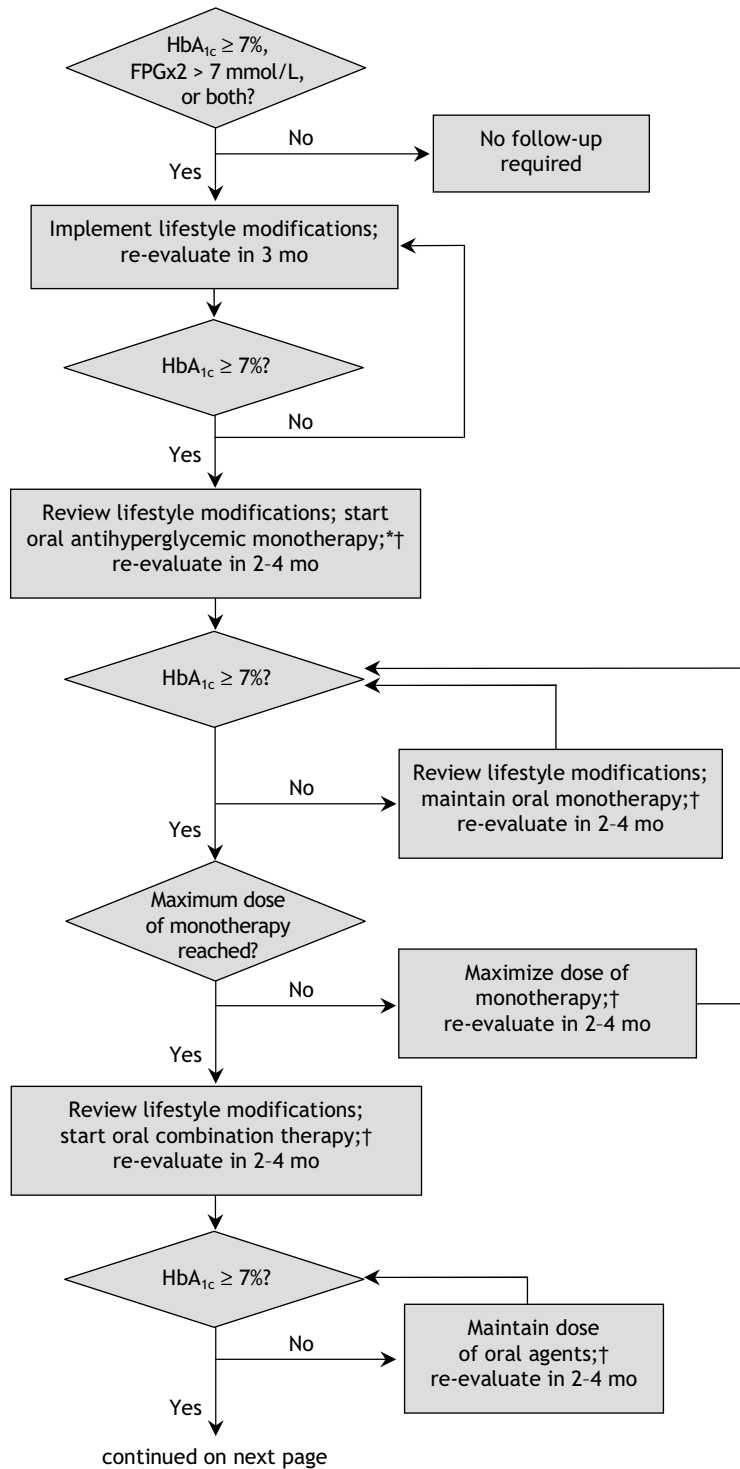

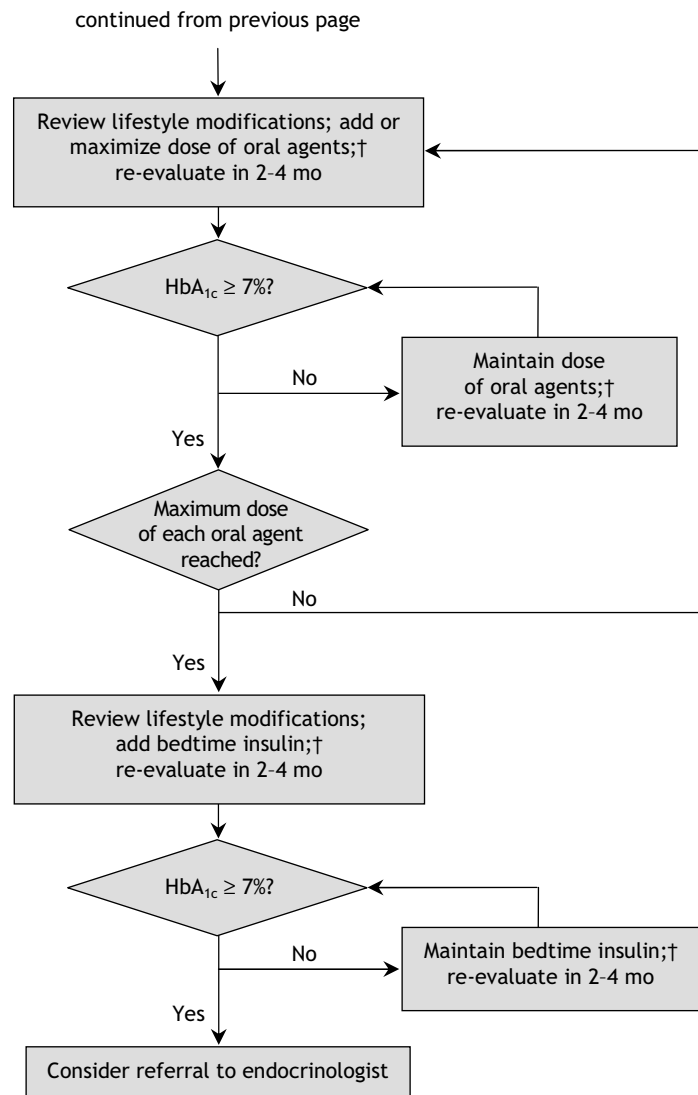

\*The UK Prospective Diabetes Study recommends that metformin be considered as initial therapy for obese patients (Turner RC, et al; UK Prospective Diabetes Study [UKPDS] Group. *JAMA* 1999;281:2005-12)  
 †If at any time the patient experiences symptomatic hyperglycemia and ketosis, start insulin therapy and refer patient to an endocrinologist.
